# Supplementary material for: Glycolytic flux in Saccharomyces cerevisiae is dependent on RNA polymerase III and its negative regulator Maf1
Source: PubMed Central journal article supplement — Biochem J. 2019 Apr 4;476(7):1053–82. doi: 10.1042/BCJ20180701 (PMC6448137; doi:10.1042/bcj20180701), 2019-04-04

## Supplementary Materials Legends

### **S1 Fig. Neither *rpc128-1007*, nor *maf1Δ* are auxotrophic for glutamate.**

Yeast strains MB159-4D (WT), *maf1Δ* and *rpc128-1007* were grown overnight in rich medium supplemented with 2% glucose. The cells were washed twice with minimal medium supplemented with 2% glucose without glutamate or glutamine and diluted to appropriate  $D_{600}$ . Cells dilutions were spotted on solid synthetic minimal medium supplemented with 2% glucose and basics amino acids either without (A) or with addition of 100 mg/L glutamate and incubated at 30°C for 2 days. Growth curves (C) for tested strains were measured in the same media (minimal medium supplemented with 2% glucose and basics amino acids without or with the addition of glutamate) at 30°C for several hours. Experiments were carried out for two independent biological replicates.

### **S2 Fig. Real-time quantitative PCR analyses of *LEU3* gene transcript.**

Slight increase in *LEU3* transcript levels was observed in *rpc128-1007* in glucose medium. Opposite effect was observed on glycerol-based rich medium. Maf1 deficiency cause 2-fold decrease in *LEU3* mRNA levels, when grown non-fermentative carbon source and reduced in glucose-based rich medium. Yeast cells were grown in 2% glucose (YPD) or 2% glycerol (YPGly) rich medium at 30°C until an  $D_{600} \approx 1.0$ . SYBER-Green based Real-Time PCR was performed. The expression level of each target PCR product was normalized to reference genes transcript levels: *U2* spliceosomal RNA (*U2*) and small cytosolic RNA (*SCR1*). The means + standard deviations of the relative expression levels from three independent biological replicates are shown. The value of basal gene expression level of WT strain was assumed as 1.0. Asterisks (\*) indicate  $P$ -values  $\leq 0.05$  determined by t-student test.

### **S1 Table. Mean value for triplicate experiments of fermentative capacity assay of WT and *maf1Δ* cells.**

Results are expressed in mM / g dry weight. 'C-limited' stands for 'carbon-limited conditions'.

**S2 Table. The list of 8 proteins involved in oxidative stress with higher abundance in *maf1Δ* and lowered quantity in *rpc128-1007* mutant in comparison to wild-type reference strain under high glucose conditions according to global proteomics.**

**S3 Table.** The list of 18 proteins regulated by RPN4 that are part of 26S proteasome and its core complex, 20S proteasome, with lowered abundance in *rpc128-1007* mutant in comparison to wild-type reference strain under high glucose conditions according to global proteomics.

**S4 Table.** The list of 73 proteins involved in ribosome biogenesis with lowered abundance in *rpc128-1007* mutant in comparison to wild-type reference strain under high glucose conditions according to global proteomics.

**S1 Table**

| Ethanol [mM / g dry weight] |          |
|-----------------------------|----------|
| WT                          | 15.52365 |
| <i>maf1</i> Δ               | 16.20646 |
| WT C-limited                | 72.9832  |
| <i>maf1</i> Δ C-limited     | 84.02746 |

**S2 Table**

| ORF         | Protein function                       |
|-------------|----------------------------------------|
| <i>CTT1</i> | Cytosolic catalase.                    |
| <i>GAD1</i> | Glutamate decarboxylase.               |
| <i>YPR1</i> | NADPH-dependent aldo-keto reductase.   |
| <i>GRX2</i> | Cytoplasmic glutaredoxin.              |
| <i>RCK2</i> | Protein kinase involved in response to |

|             |                                     |
|-------------|-------------------------------------|
|             | oxidative stress.                   |
| <i>AHP1</i> | Thiol specific peroxiredoxin.       |
| <i>TRR1</i> | Cytoplasmic thioredoxin reductase.  |
| <i>TSA1</i> | Cytoplasmic thioredoxin peroxidase. |

**S3 Table**

| ORF          | Protein function                                                                                                                                              |
|--------------|---------------------------------------------------------------------------------------------------------------------------------------------------------------|
| <i>RPN5</i>  | Subunit of the 26S proteasome lid complexes.                                                                                                                  |
| <i>RPN6</i>  | 26S proteasome non-ATPase regulatory subunit.                                                                                                                 |
| <i>RPN9</i>  |                                                                                                                                                               |
| <i>RPN10</i> | Non-ATPase base subunit of the 19S RP of the 26S proteasome.                                                                                                  |
| <i>RPN11</i> | Metalloprotease subunit of 19S regulatory particle and part of 26S proteasome lid that couples the deubiquitination and degradation of proteasome substrates. |
| <i>CIC1</i>  | Protein that interacts with proteasome components and has a potential role in proteasome substrate specificity.                                               |
| <i>UBP6</i>  | Ubiquitin-specific protease that is situated in the base subcomplex of the 26S proteasome.                                                                    |
| <i>SCL1</i>  | Alpha 1 subunit of the 20S proteasome that is involved in the degradation of ubiquitinated substrates.                                                        |
| <i>RPT1</i>  | ATPase of the 19S regulatory particle of the 26S proteasome.                                                                                                  |
| <i>RPT3</i>  |                                                                                                                                                               |
| <i>PUP1</i>  | Beta 2 subunit of the 20S proteasome that is endopeptidase with trypsin-like activity that cleaves after basic residues.                                      |
| <i>RPN2</i>  | Subunit of the 26S proteasome and a substrate of the N-acetyltransferase Nat1p.                                                                               |
| <i>PRE3</i>  | Beta 1 subunit of the 20S proteasome.                                                                                                                         |
| <i>PRE4</i>  | Beta 7 subunit of the 20S proteasome.                                                                                                                         |
| <i>PRE7</i>  | Beta 6 subunit of the 20S proteasome.                                                                                                                         |

|              |                                        |
|--------------|----------------------------------------|
| <i>PRE9</i>  | Alpha 3 subunit of the 20S proteasome. |
| <i>PRE10</i> | Alpha 7 subunit of the 20S proteasome. |
| <i>PUP2</i>  | Alpha 5 subunit of the 20S proteasome. |

S4 Table

| ORF                                                                                                                                                                                                                                                                                                                           | Protein function                                                                                     |
|-------------------------------------------------------------------------------------------------------------------------------------------------------------------------------------------------------------------------------------------------------------------------------------------------------------------------------|------------------------------------------------------------------------------------------------------|
| <i>RPS1, RPS2, RPS3, RPS4B, RPS5, RPS6B, RPS7B, RPS9A, RPS9B, RPS11B, RPS12, RPS13, RPS14B, RPS17B, RPS18B, RPS19B, RPS24B, RPS25A, RPS26A, RPS27B, RPS29B, RPS31</i>                                                                                                                                                         | Protein component of the small (40S) ribosomal subunit.                                              |
| <i>RPL1B, RPL2B, RPL3, RPL4A, RPL4B, RPL6A, RPL6B, RPL7A, RPL7B, RPL8B, RPL10, RPL11B, RPL12B, RPL13A, RPL13B, RPL14B, RPL15A, RPL16B, RPL17B, RPL18B, RPL19B, RPL20B, RPL21A, RPL23B, RPL24A, RPL24B, RPL26B, RPL27A, RPL28, RPL31A, RPL32, RPL33A, RPL33B, RPL34A, RPL35B, RPL36A, RPL37B, RPL38, RPL39, RPL42B, RPL43B</i> | Ribosomal 60S subunit protein.                                                                       |
| <i>RPP0</i>                                                                                                                                                                                                                                                                                                                   | Ribosomal protein involved in interaction between translational elongation factors and the ribosome. |

|              |                                                                                                                                     |
|--------------|-------------------------------------------------------------------------------------------------------------------------------------|
| <i>MRT4</i>  | Protein involved in mRNA turnover and ribosome assembly.                                                                            |
| <i>NOPI</i>  | Component of the small subunit processome complex, which is required for processing of pre-18S rRNA.                                |
| <i>NOPI2</i> | Nucleolar protein involved in pre-25S rRNA processing, involved in biogenesis of large 60S ribosomal subunit.                       |
| <i>HMO1</i>  | rDNA-binding component that regulates transcription from RNA polymerase I promoters.                                                |
| <i>NSR1</i>  | Required for pre-rRNA processing and ribosome biogenesis.                                                                           |
| <i>ARB1</i>  | ATPase of the ATP-binding cassette (ABC) family; involved in 40S and 60S ribosome biogenesis.                                       |
| <i>SAS10</i> | Involved in production of 18S rRNA and assembly of small ribosomal subunit.                                                         |
| <i>RPP2B</i> | Ribosomal protein P2 beta; a component of the ribosomal stalk.                                                                      |
| <i>ASCI</i>  | Core component of the small (40S) ribosomal subunit, required to prevent frameshifting at ribosomes stalled at repeated CGA codons. |

**A.** Synthetic minimal medium supplemented with 2% glucose and amino acids without glutamate or glutamine

**B.** Synthetic minimal medium supplemented with 2% glucose and 100 mg/L glutamate

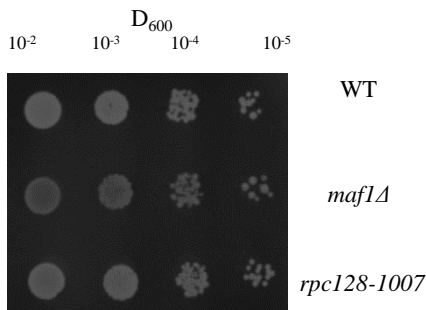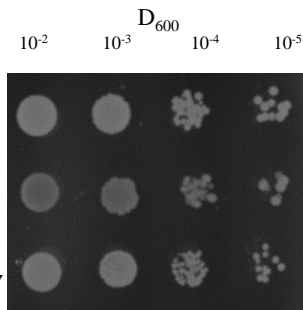

**C.** **Growth curve**

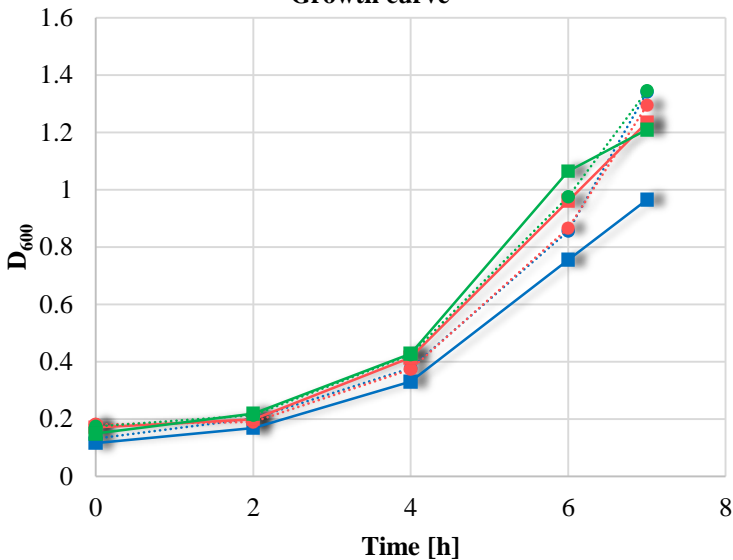

.....●..... WT (+Gln)  
 .....●..... *maf1Δ* (+Gln)  
 .....●..... *rpc128-1007* (+Gln)

—■— WT  
 —■— *maf1Δ*  
 —■— *rpc128-1007*

*LEU3*

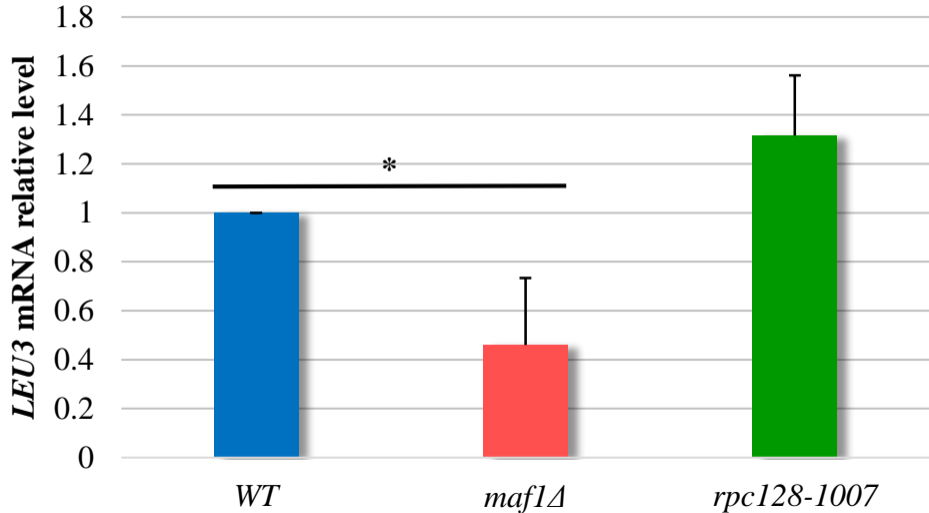

Supplement: BCJ-476-1053-s1.pdf [file BCJ-476-1053-s1.pdf]
